# Supplementary material for: A cysteine-induced one-pot synthesis of Au nanoparticle chains with tuneable NIR absorption and application in photothermal-chemo cancer therapy
Source: Royal Society of Chemistry journal article supplement (doi:10.1039/d2nj02339c), 2022-01-01
Supplement: d2nj02339c1.pdf [file d2nj02339c1.pdf]

## Supplementary Information for

### **Cysteine-induced one-pot synthesis of Au nanoparticle chains with tuneable NIR absorption and application in photothermal-chemo cancer therapy**

Pengcheng Gao, Yingying Wei, Qianrui Xu and Yong Jiang\*

School of Chemistry and Chemical Engineering, Jiangsu Province Hi-Tech Key Laboratory for Biomedical Research, Southeast University, Nanjing 211189, P.R. China

\* E-mail: yj@seu.edu.cn

#### **Materials**

Chloroauric acid ( $\text{HAuCl}_4 \cdot 4\text{H}_2\text{O}$ ), silver nitrate and L-cysteine (L-cys) were purchased from Aldrich. Sodium hydroxide (NaOH), TEOS, pyrogallol and sodium borohydride ( $\text{NaBH}_4$ ) were purchased from Shanghai Chemical Reagent Corp. Doxorubicin hydrochloride (DOX) was purchased from Beyotime Biotechnology Co., Ltd.  $\text{NH}_2$ -PEG-SH ( $M_w=500$ ) was purchased from Yarebio (Shanghai, China). Phosphate buffer (PBS), Paryzyme and all the other biological reagents, including 1640 culture medium, fetal bovine serum (FBS) were purchased from Sangon Biotech.

MCF-7 cells were obtained from the Chinese Academy of Sciences Cells Bank. Water used in this experiment was purified by distillation of deionized water.

### **The calculation of photothermal conversion efficiency**

According to previous literatures, the photothermal conversion efficiencies of AuNCs@mSiO<sub>2</sub> was calculated according to following equation

$$\eta = \frac{hs(T_{max} - T_{surr}) - Q_{dis}}{I(1 - 10^{-A_{808}})} \times 100\%$$

Where h is heat transfer coefficient, S is the surface area of the container. T<sub>max</sub> is the equilibrium temperature, T<sub>surr</sub> represent ambient temperature. These parameters can be calculated according to Fig. S5. The Q<sub>dis</sub> means the dissipated heat absorbed by the quartz cell under laser irradiation and it was measured independently to be 0.086 W/°C using a quartz cuvette cell containing pure water. I is incident laser power (2 W cm<sup>-2</sup>), A<sub>808</sub> is the absorbance of particles at 808 nm. The photothermal conversion efficiencies of AuNCs@mSiO<sub>2</sub> is 31.9%.

**Table. S1.** Details of Sample d-i including diameter, length, assembly number and wavenumber of LSPR.

| <b>L-cys (<math>\mu\text{L}</math>)</b> | <b>Diameter (nm)</b> | <b>Length (nm)</b> | <b>Assembly Number</b> | <b>LSPR (nm)</b> |
|-----------------------------------------|----------------------|--------------------|------------------------|------------------|
| 0                                       | $14.2 \pm 0.8$       | $50.8 \pm 5$       | 1                      | 808              |
| 10                                      | $12.1 \pm 1.7$       | $31.7 \pm 5.5$     | 1                      | 672              |
| 40                                      | $11.6 \pm 1.9$       | $20.4 \pm 4.3$     | $3 \pm 2$              | 642              |
| 80                                      | $11.9 \pm 1.9$       | $16.3 \pm 5.6$     | $11 \pm 3$             | 808              |
| 140                                     | $11.1 \pm 2.2$       | $12.6 \pm 3.7$     | $19 \pm 5$             | 755              |
| 200                                     | $11.1 \pm 2.1$       | $11.5 \pm 2.9$     | —                      | 718              |

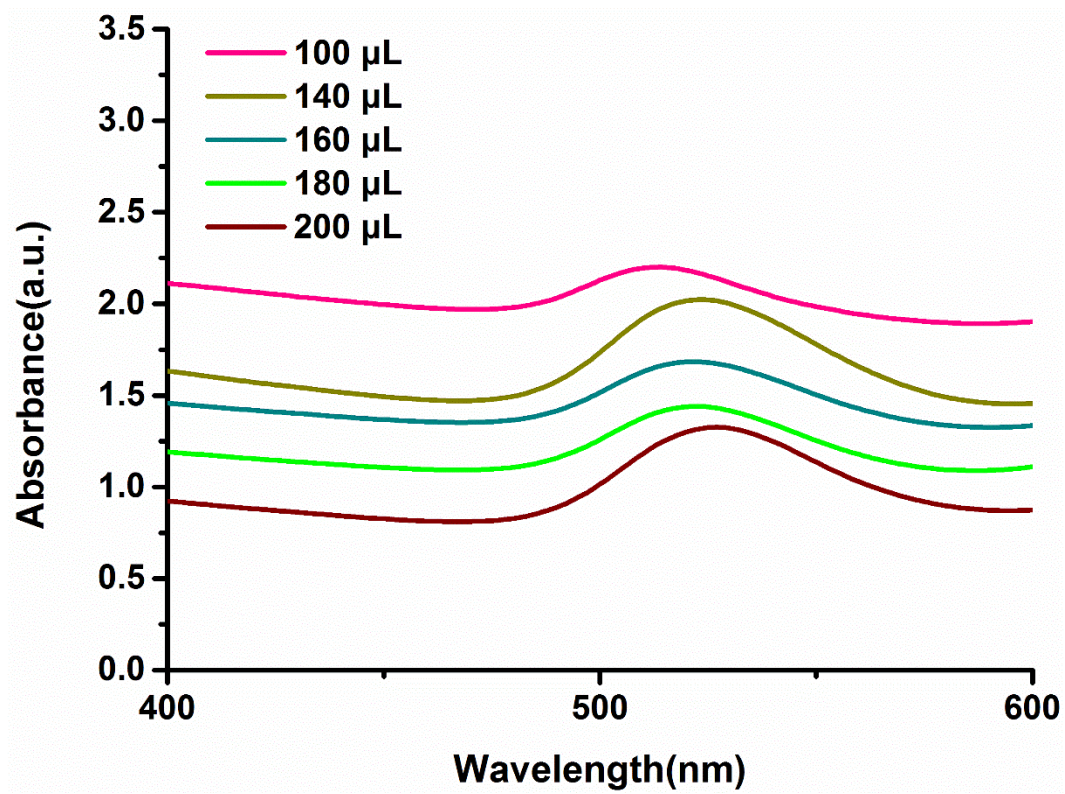

Fig. S1. UV spectrum of Fig. 1c with wavelength ranging from 400 to 600 nm.

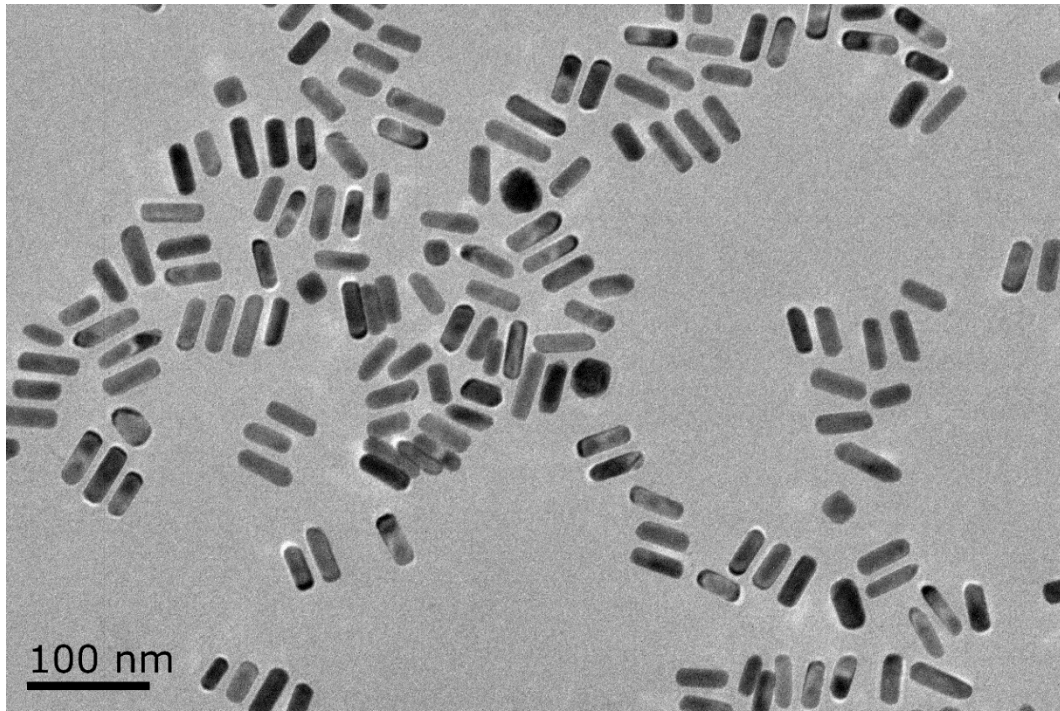

**Fig. S2.** TEM image of AuNPs with the addition Lysine (40  $\mu$ L, 0.5 mM)

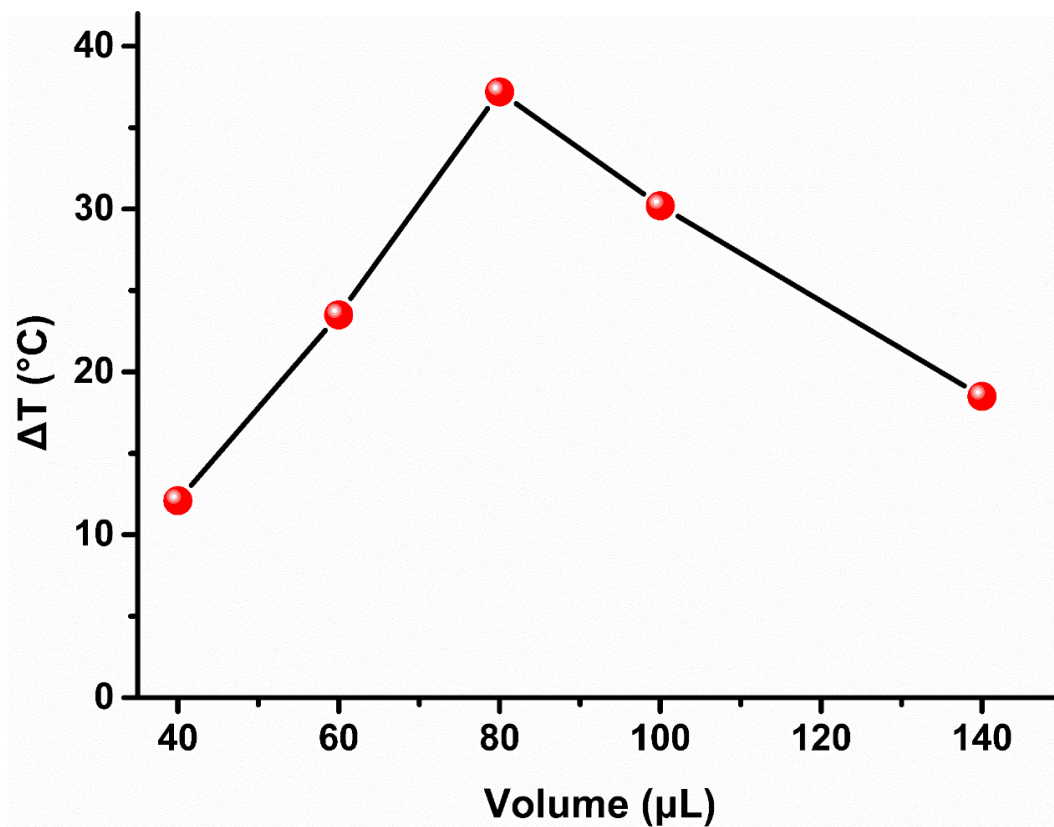

**Fig. S3.** The plot of temperature change ( $\Delta T$ ) of a fixed concentration of AuNCs changed with the volume of L-cys.

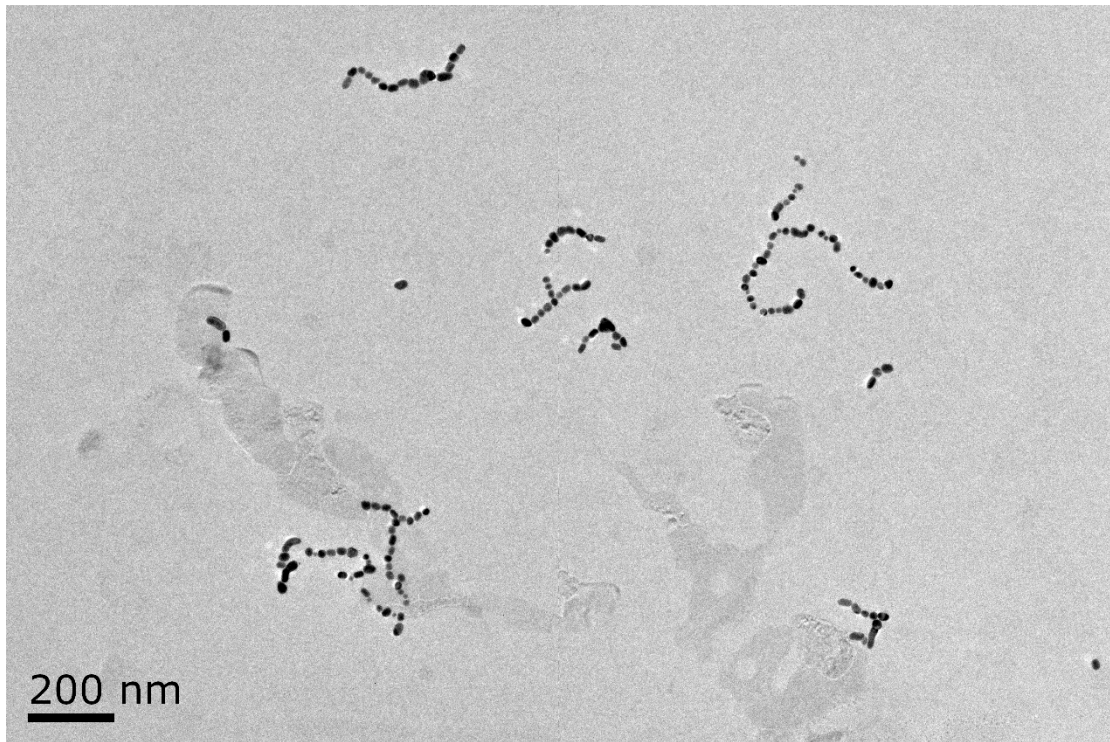

**Fig. S4.** TEM image of AuNCs after photothermal conversion experiment.

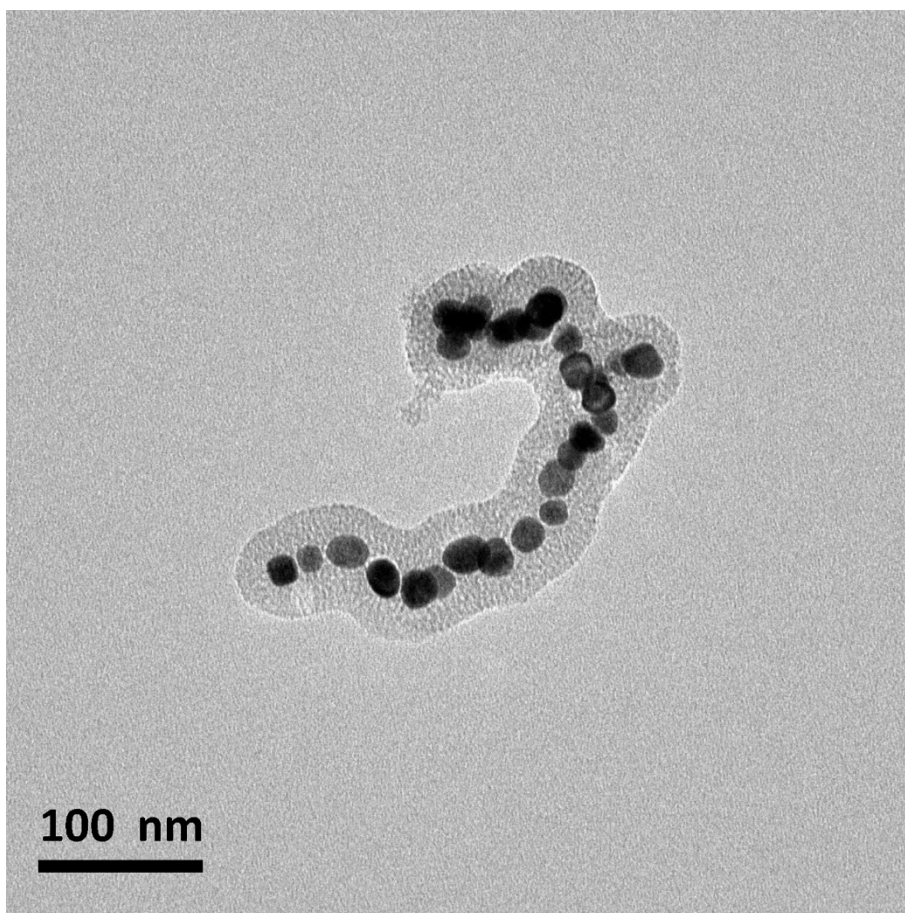

**Fig. S5.** Enlarged TEM image of a single AuNCs coated with Mesoporous SiO<sub>2</sub>.



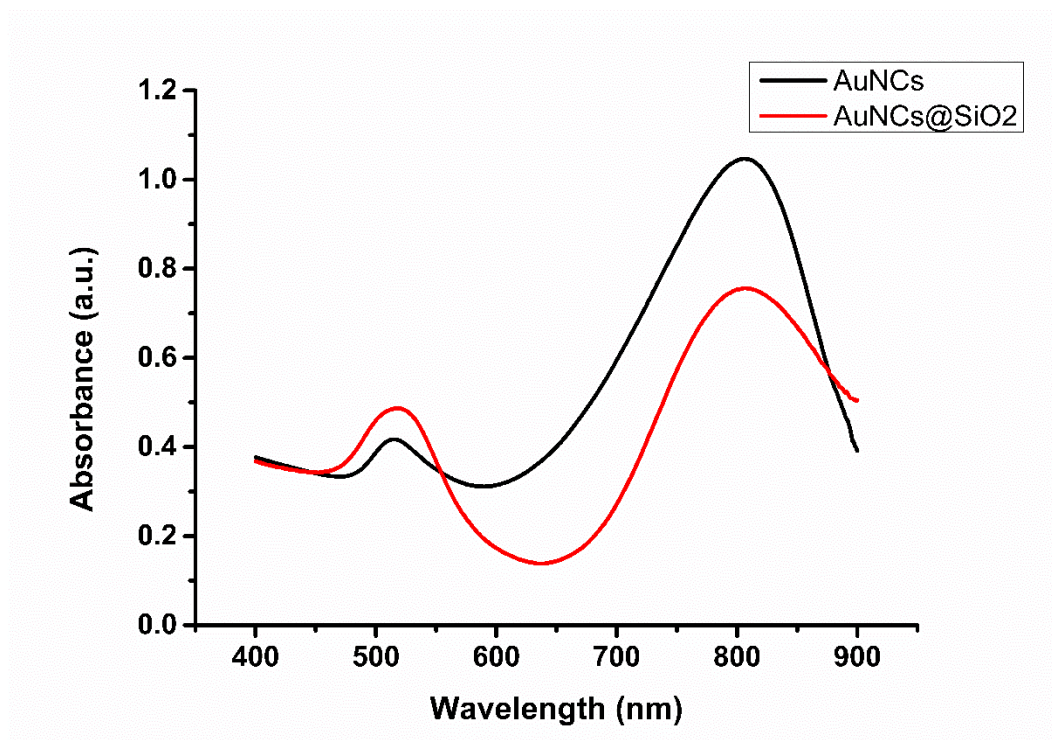

**Fig. S6.** UV-Vis spectra of AuNCs and AuNCs@mSiO<sub>2</sub>.

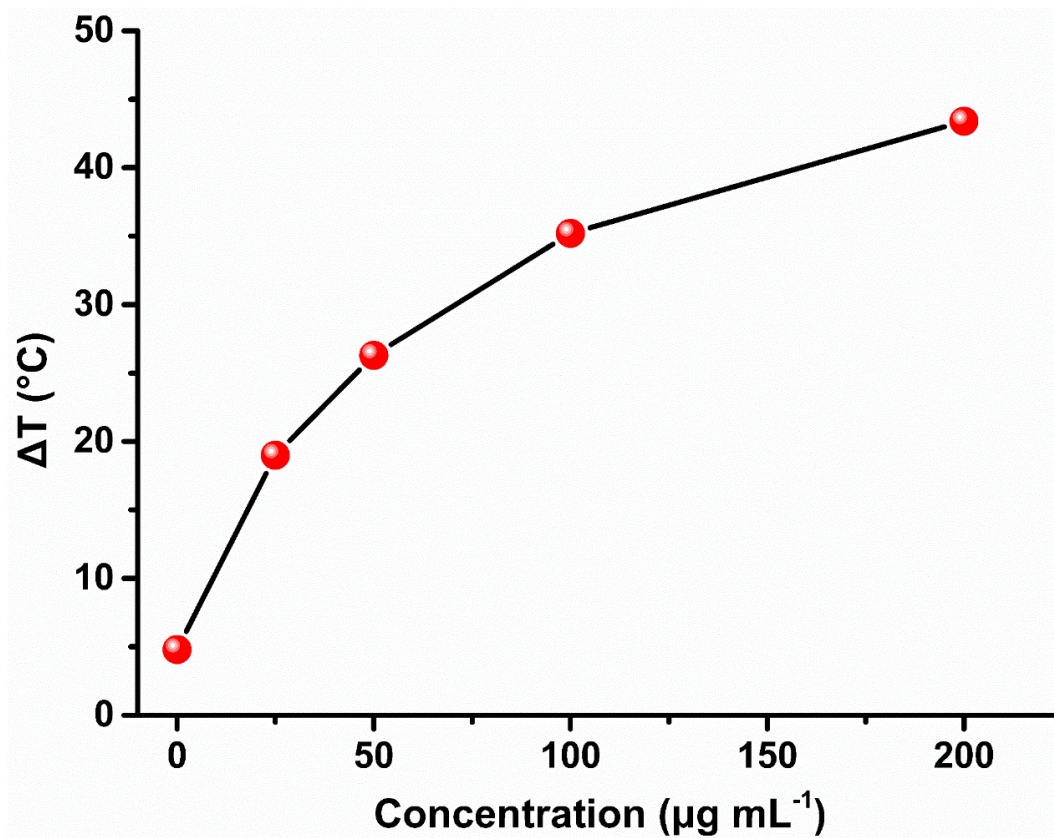

**Fig. S7.** The plot of temperature change ( $\Delta T$ ) of different concentration of AuNCs@mSiO<sub>2</sub>.

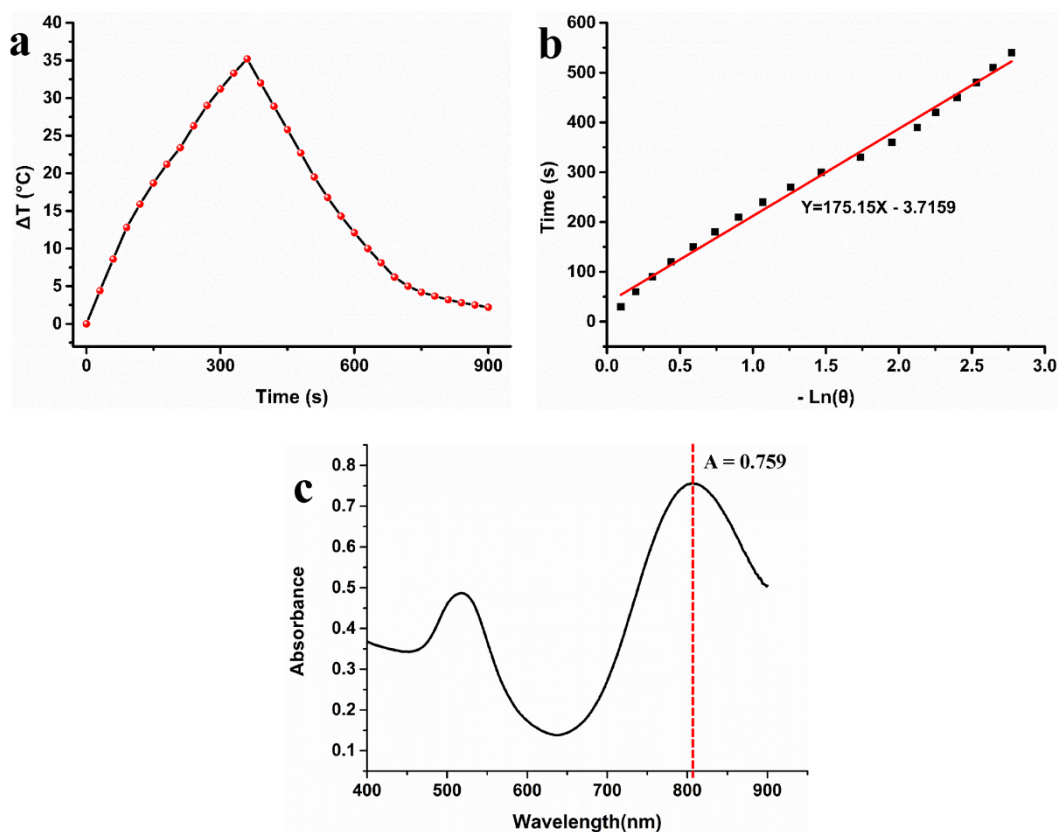

**Fig. S8.** (a) Photothermal curves of AuNCs@mSiO<sub>2</sub> aqueous solution (100  $\mu\text{g mL}^{-1}$ , Au) under 808 nm laser irradiation (2 W  $\text{cm}^{-2}$ , 6 min) and a subsequent cooling process. (b) Time constant for heat transfer from the system is determined to be  $\tau_s = 175.15$  by applying the linear time data from the cooling period versus negative natural logarithm of driving force temperature. (c) Absorption spectrum of AuNCs@mSiO<sub>2</sub> aqueous solution (100  $\mu\text{g mL}^{-1}$ ).

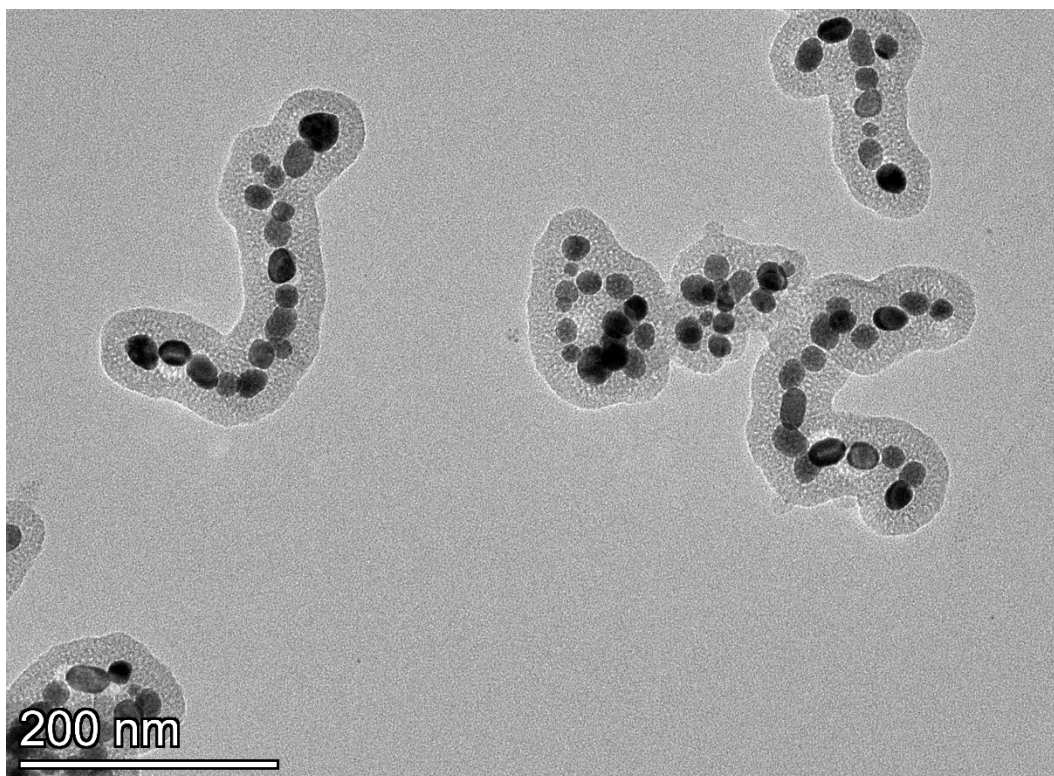

**Fig. S9.** TEM image of AuNCs@mSiO<sub>2</sub> after 5 heating-cooling cycles.

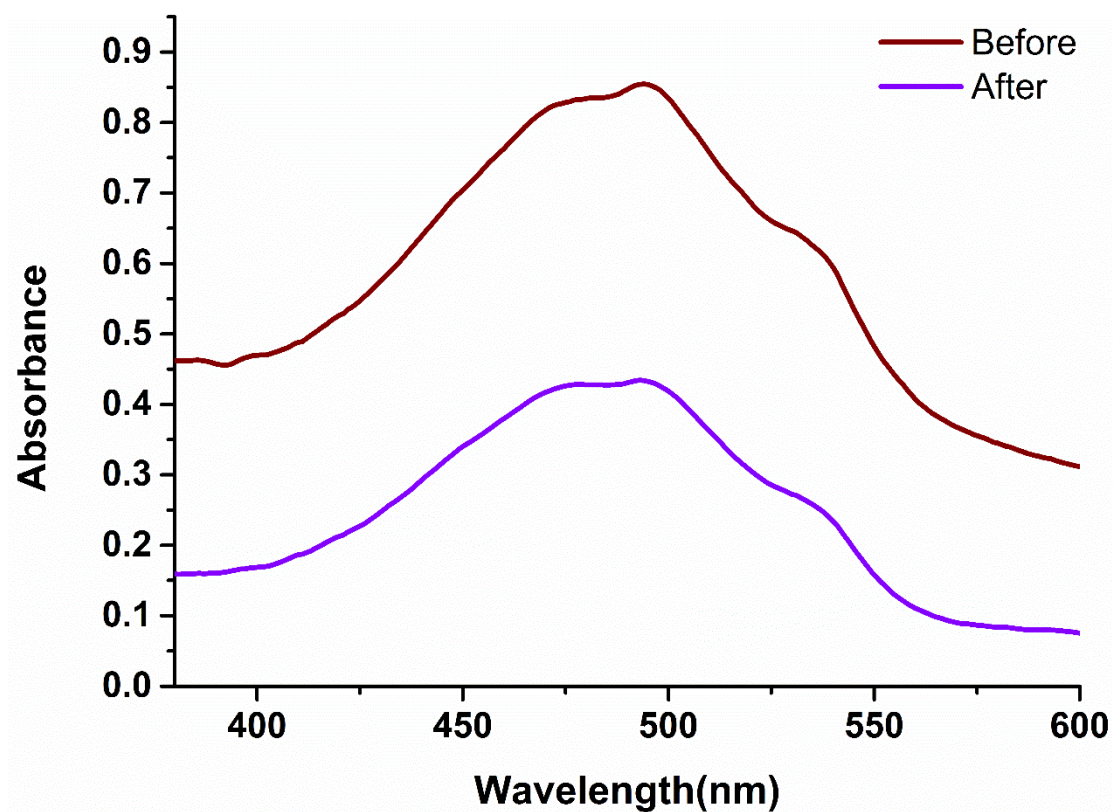

**Fig. S10.** UV-Vis spectra of DOX before and after interaction with the AuNCs@mSiO<sub>2</sub>

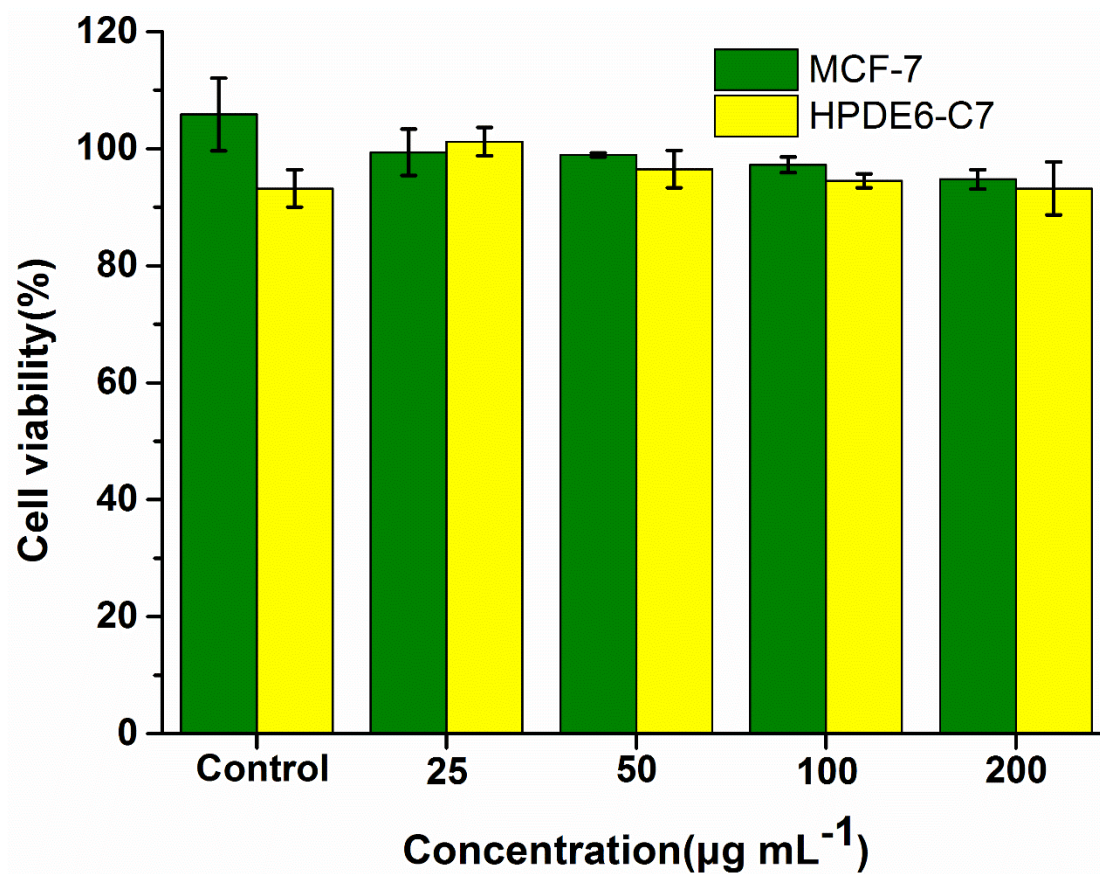

**Fig. S11.** Cell viability of MCF-7 and HEPD6-C7 after incubation with different AuNCs@mSiO<sub>2</sub> concentration.

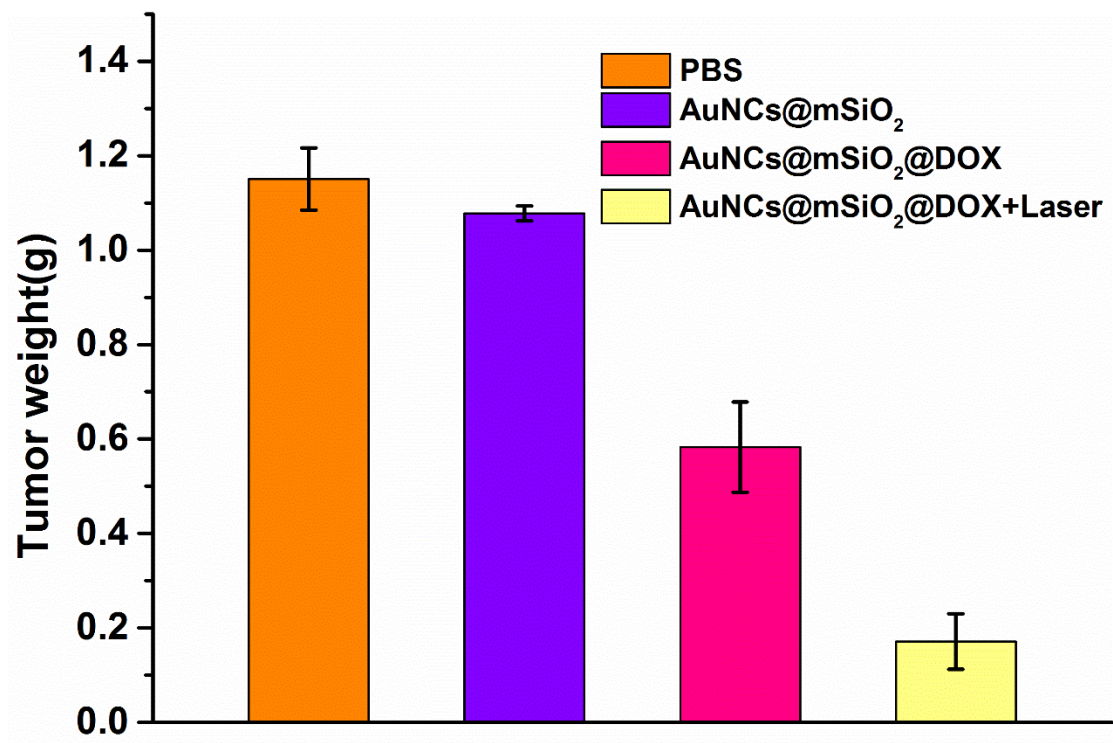

Fig. S12. Mean tumor weights of each group at the last day of experiment. Data are presented as means  $\pm$  SD (n = 3).

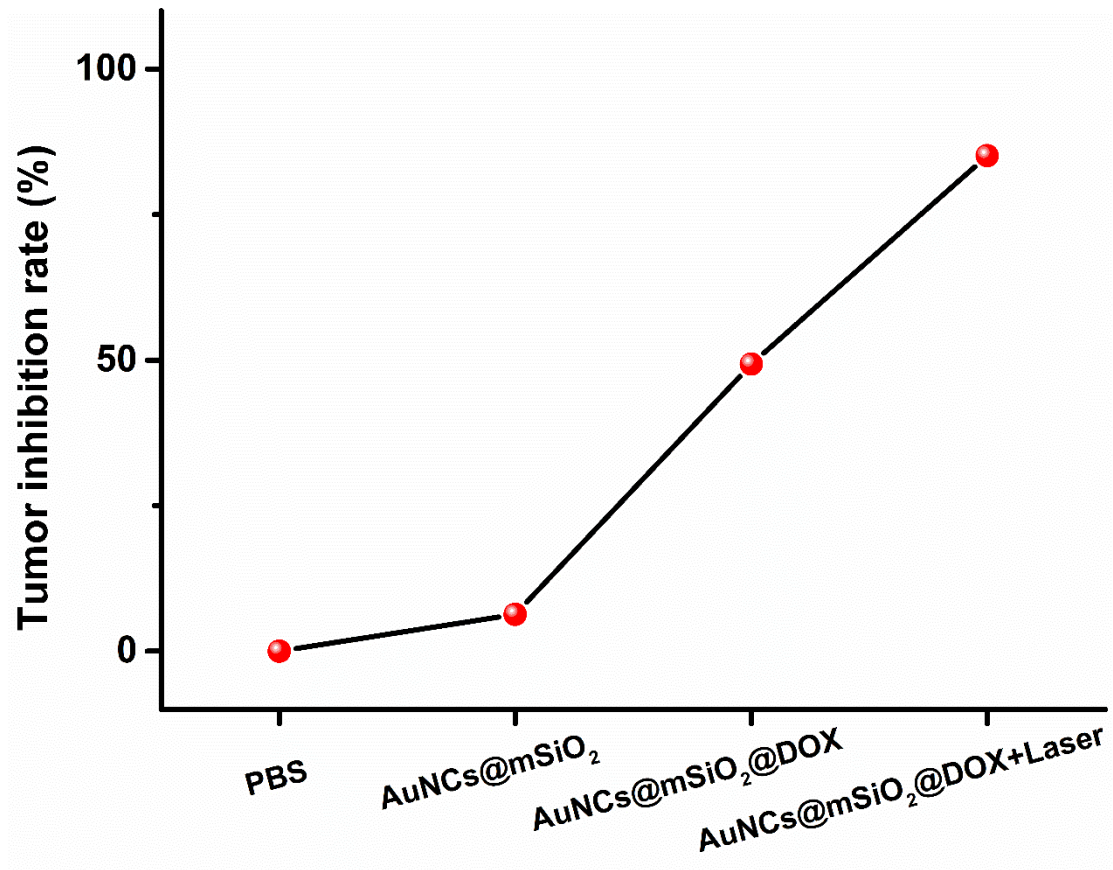

Fig. S13. Tumor inhibition rate of each group at the last day of experiment.



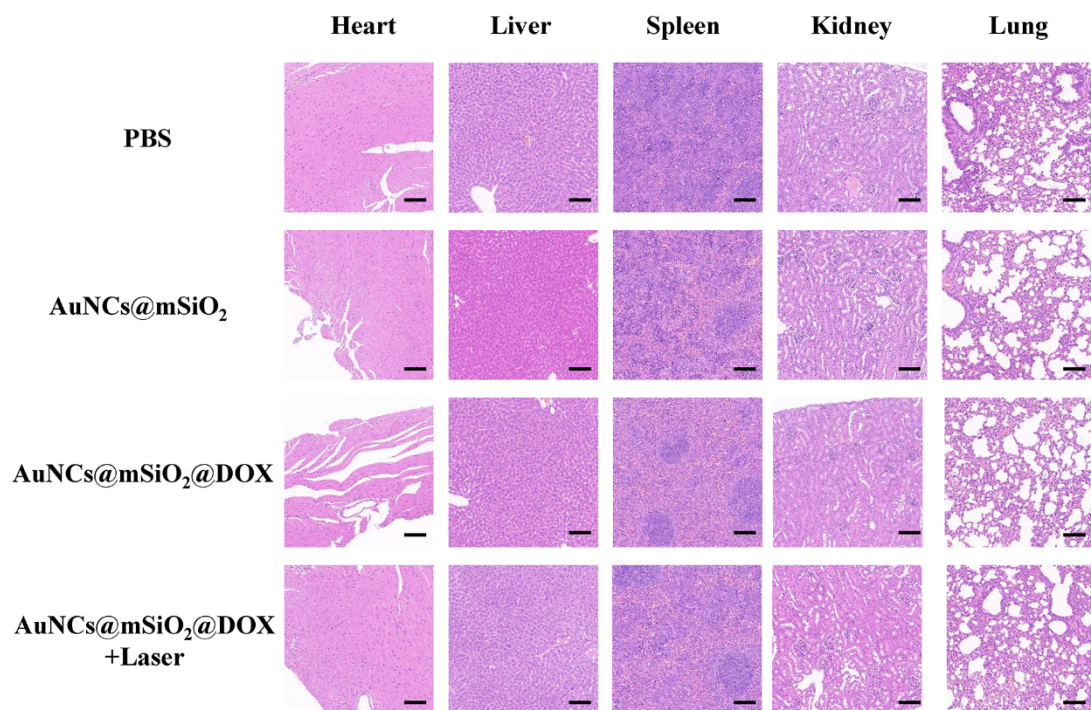

**Fig. S14.** H&E staining images of major organs with different treatment. Scale bars is 100  $\mu\text{m}$ .
